# Supplementary material for: Dual-responsive star-shaped polypeptides for drug delivery
Source: Royal Society of Chemistry journal article supplement (doi:10.1039/c5ra20972b), 2015-12-02
Supplement: c5ra20972b1.pdf [file c5ra20972b1.pdf]

## Supplementary Information

### Dual-responsive star-shaped polypeptides for drug delivery

Wenlong Wang, <sup>#a</sup> Liang Zhang, <sup>#a</sup> Mengtao Liu,<sup>a</sup> Yuan Le,<sup>\*a</sup>

Shanshan Lv<sup>a</sup> and Jian-Feng Chen<sup>ab</sup>

<sup>a</sup>State Key Laboratory of Organic-Inorganic Composites, Beijing University of Chemical Technology, Beijing 100029, PR China.

<sup>b</sup>Research Center of the Ministry of Education for High Gravity Engineering and Technology,  
Beijing University of Chemical Technology, Beijing 100029, PR China

<sup>#</sup> These authors contributed equally to this work.

Corresponding author. Tel: +86-10-64447274. E-mail: [leyuan@mail.buct.edu.cn](mailto:leyuan@mail.buct.edu.cn)

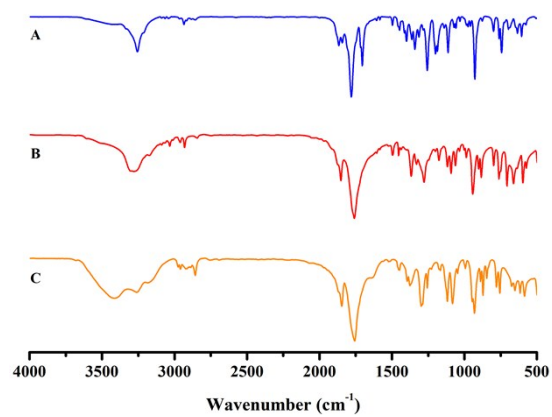

Fig. 1S FT-IR spectra of BLG-NCA (A), Phe-NCA (B) and Cys-NCA (C).

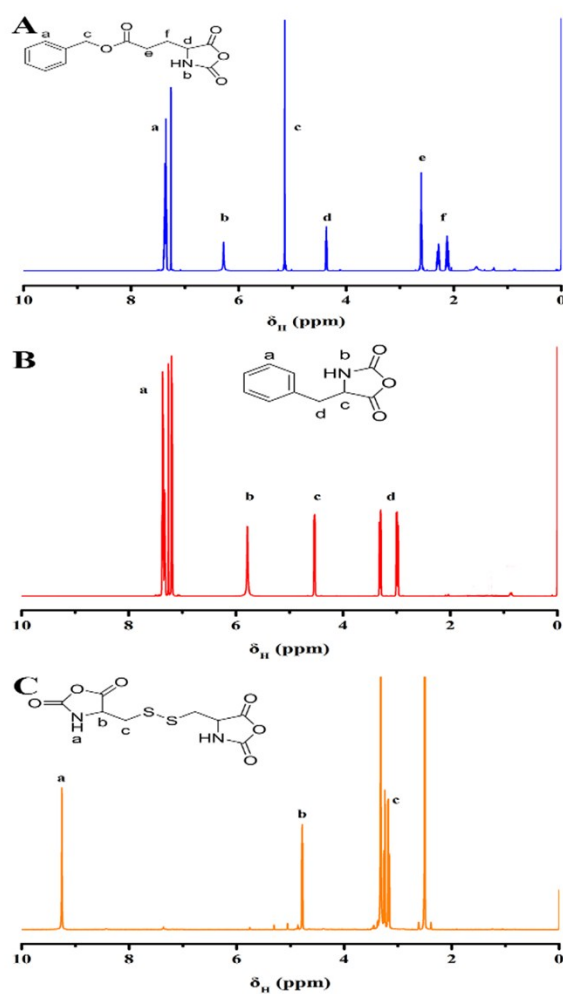

Fig. 2S  $^1\text{H}$  NMR spectrum of BLG-NCA (A,  $\text{CDCl}_3$ ), Phe-NCA (B,  $\text{CDCl}_3$ ) and Cys-NCA (C,  $\text{DMSO-d}_6$ ).
